# Supplementary material for: Flame Retardancy of Wood Fiber Materials Using Phosphorus-Modified Wheat Starch
Source: PubMed Central journal article supplement (PMC7024314; doi:10.3390/molecules25020335), 2020-01-14

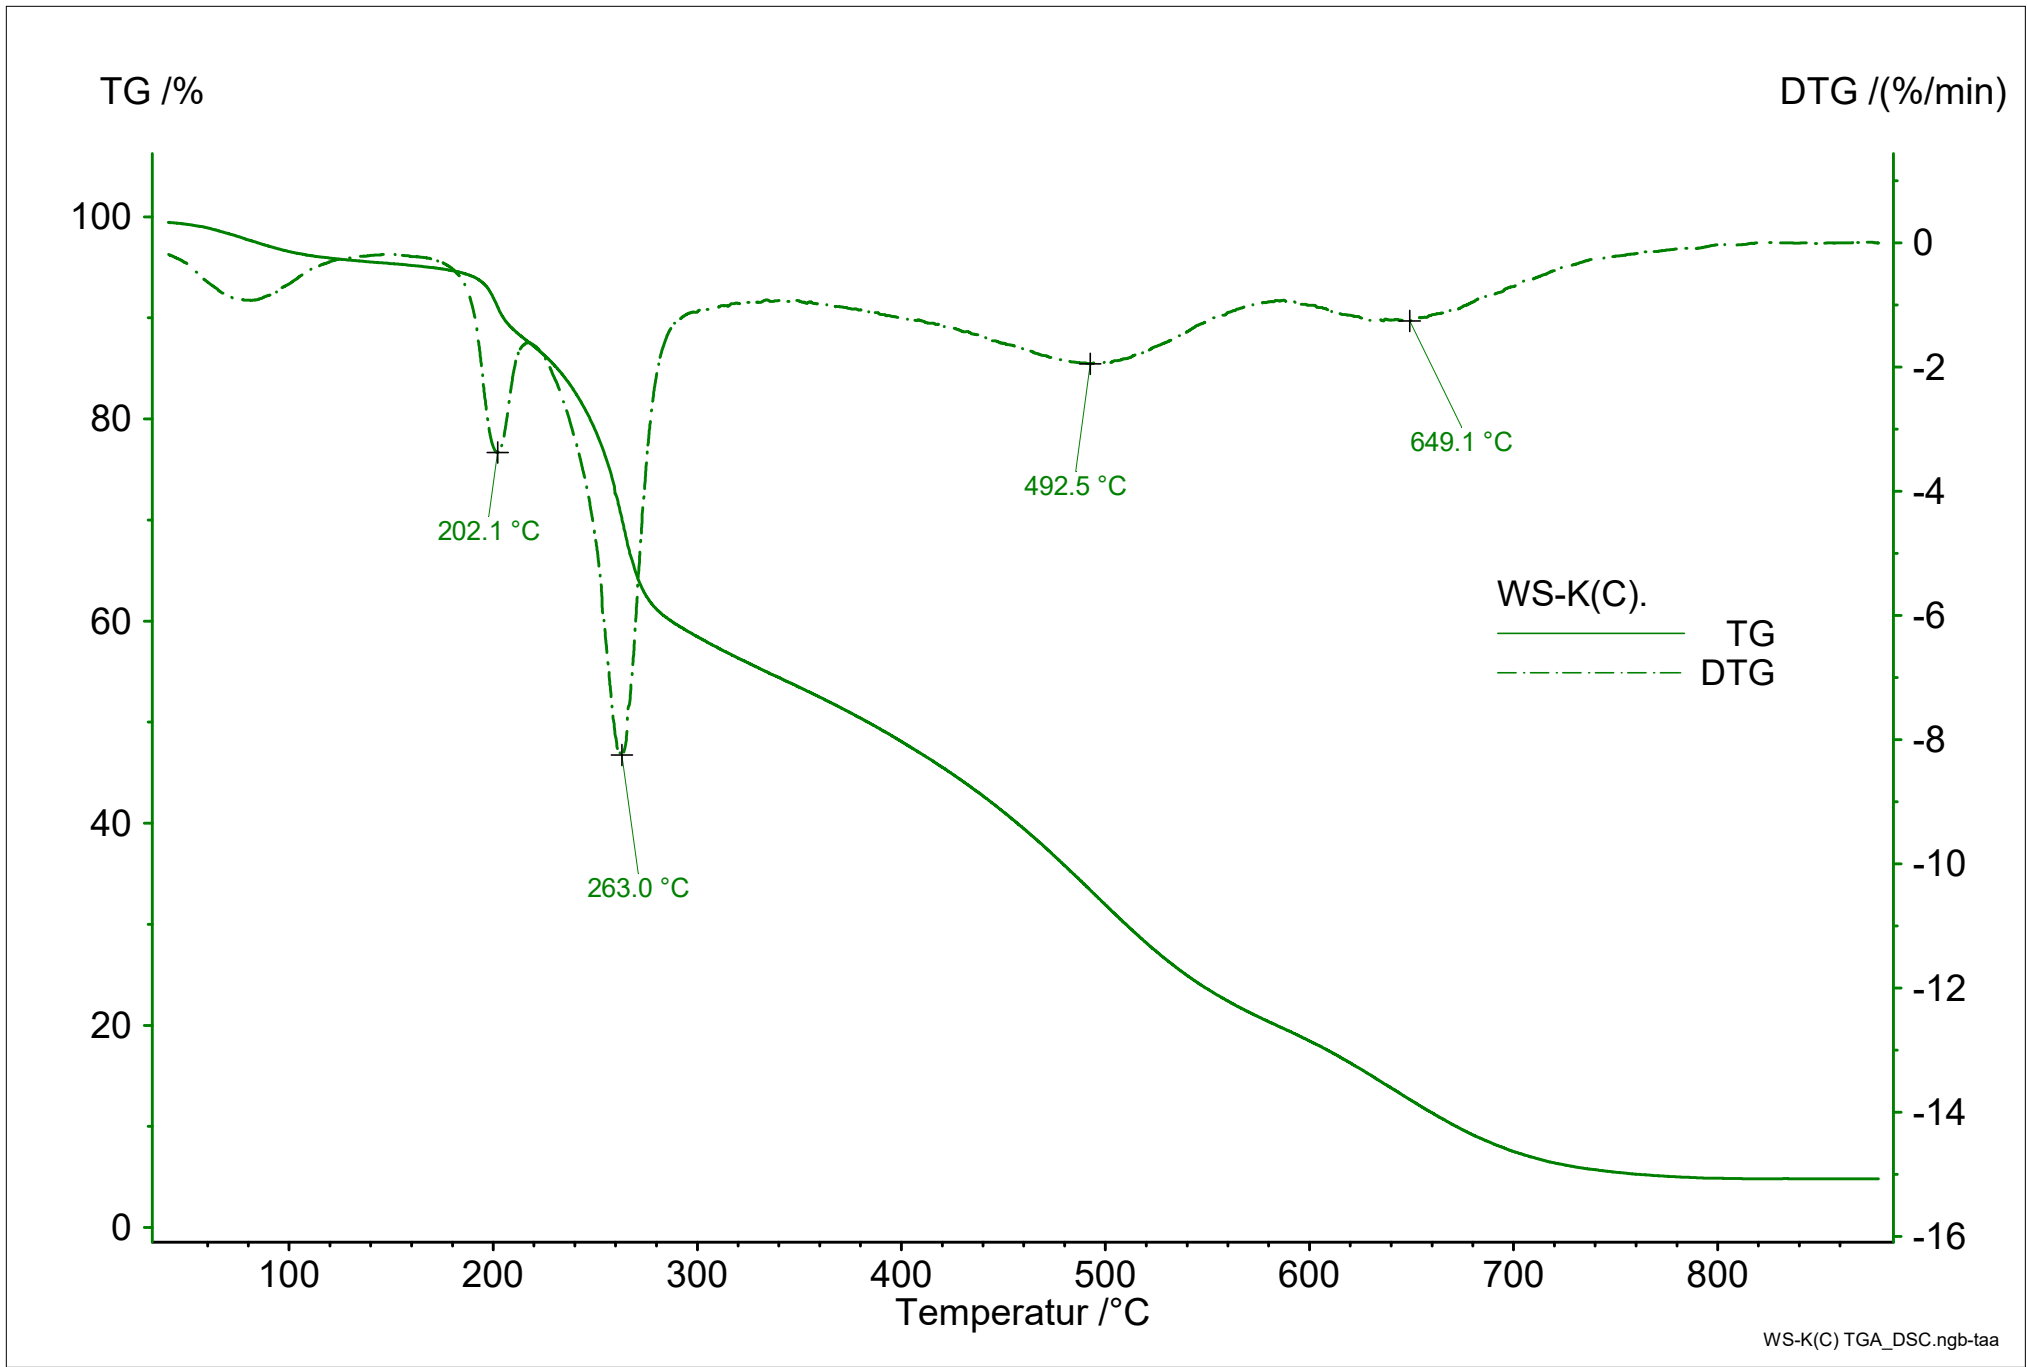

Supplement: molecules-25-00335-s001.pdf [file molecules-25-00335-s001.pdf]
